# Supplementary material
Source: publisher figshare collection journal article supplement (https://diabetesjournals.figshare.com/articles/dataset/_/13652960)
Supplement: Supplementary file 1 [file 1]

Supplemental Table 1. Buffer X

| <b>Reagent</b>                       | <b>Concentration</b> |
|--------------------------------------|----------------------|
| K <sub>2</sub> EGTA                  | 7.23 mM              |
| CaK <sub>2</sub> EGTA                | 2.77 mM              |
| Imidazole                            | 20 mM                |
| Taurine                              | 20 mM                |
| Na-ATP                               | 5.7 mM               |
| Na-PCr                               | 14.3 mM              |
| MgCl <sub>2</sub> -6H <sub>2</sub> O | 6.56 mM              |
| MES potassium salt                   | 50 mM                |

pH = 7.1

Supplemental Table 2. Buffer Z

| <b>Reagent</b>                       | <b>Concentration</b> |
|--------------------------------------|----------------------|
| MES Potassium Salt                   | 105 mM               |
| KCl                                  | 30 mM                |
| KH <sub>2</sub> PO <sub>4</sub>      | 10 mM                |
| MgCl <sub>2</sub> -6H <sub>2</sub> O | 5 mM                 |
| BSA                                  | 0.5 mg/ml            |

pH = 7.1
