# Supplementary material
Source: publisher figshare collection journal article supplement (https://diabetesjournals.figshare.com/articles/dataset/_/13652960)
Supplement: Supplementary file 1 [file 1]

## Sheet: Supp. Tab 3
	WT Relapse vs WLM		mCK-hLPL Relapse vs WLM		mCK-hLPL vs WT during WLM		mCK-hLPL vs WT during Relapse
Gene	Log2 FC	P	Log2 FC	P	Log2 FC	P	Log2 FC	P
Lpl	0.0509898	0.691183	0.106271	0.379766	0.301243	0.0127994	0.356524	0.00546869
Gpihbp1	-0.433881	0.0148822	-0.166323	0.320908	0.0567799	0.734901	0.324339	0.068522
Cd36	-0.500818	2.44381e-05	-0.414311	0.00021188	0.00312395	0.977715	0.0896307	0.450134
Acsl3	-0.766724	9.14726e-05	-0.898478	1.15684e-06	-0.0763399	0.678481	-0.208094	0.289731
Acsl5	0.565384	0.0172253	0.853765	0.000130578	-0.126343	0.57368	0.162037	0.492476
Fabp5	1.11802	1.12221e-05	1.8698	8.61783e-15	-0.434359	0.0754933	0.317423	0.206588
Slc25a20	-0.392858	0.000388424	-0.310725	0.00276197	0.16753	0.107004	0.249663	0.0240063
Cpt1a	-0.163286	0.28885	0.0799489	0.579691	0.0736945	0.61129	0.316929	0.0387501
Cpt1b	-0.28292	0.0147405	-0.273969	0.0122113	0.00841738	0.938634	0.0173692	0.880979
Acadl	-0.388053	0.000460728	-0.40198	0.000115665	0.283773	0.0065206	0.269846	0.0148287
Acaa2	-0.202057	0.0673362	-0.243193	0.019285	0.190959	0.0663724	0.149823	0.174632
Hadh	-0.267153	0.00229003	-0.241618	0.00338387	0.0640612	0.437391	0.089596	0.306185
Hadhb	-0.358327	2.56988e-05	-0.370075	3.9911e-06	-0.0857457	0.285083	-0.0974941	0.252342
Mlycd	-0.929371	4.5966e-17	-0.814917	4.55508e-15	0.113521	0.273806	0.227975	0.0398087
Eci2	-0.366823	0.000641781	-0.263042	0.00913499	0.116668	0.248066	0.220449	0.0400528
Decr1	-0.200089	0.0211945	-0.296324	0.000280856	0.168662	0.0389313	0.0724274	0.403668
Agpat2	1.72139	5.74308e-09	2.0656	1.27983e-13	-0.214909	0.44283	0.129309	0.66051
Agpat3	-0.0810347	0.358615	-0.155486	0.0611734	0.196122	0.0183634	0.121671	0.167558
Plin2	0.68161	9.21219e-05	0.75377	4.46676e-06	-0.0578671	0.725871	0.0142929	0.934376
Plin4	-0.910177	1.80403e-05	-0.91244	5.13981e-06	-0.263797	0.187378	-0.26606	0.210153
Plin5	-1.07145	1.93365e-09	-0.859794	2.63767e-07	0.0121502	0.941656	0.223809	0.212253
Pnpla2	-0.627323	2.63949e-05	-0.482498	0.000606874	-0.221217	0.115836	-0.0763917	0.608936
Acly	2.27677	4.55618e-09	2.88451	3.42046e-15	-0.489961	0.181515	0.117783	0.761445
Acaca	1.17428	0.00751242	1.76842	1.9613e-05	-0.502274	0.225462	0.0918684	0.834289
Acacb	-0.438774	0.00291717	-0.319266	0.0216214	-0.19626	0.157873	-0.0767528	0.602682
Fasn	1.51614	0.00184498	2.52399	3.83482e-08	-0.827138	0.0715859	0.180714	0.710486
Slc2a4	-0.0395169	0.699255	-0.0998347	0.30067	-0.189688	0.049237	-0.250006	0.0145215
Stxbp4	0.0973023	0.353971	-0.16737	0.0922397	-0.208114	0.0361874	-0.472787	6.74947e-06
Prkag3	0.477282	1.42032e-05	0.23667	0.022534	-0.188074	0.0700235	-0.428685	9.58827e-05
Hk2	-0.0194121	0.858343	-0.132367	0.197099	-0.291854	0.00444542	-0.404808	0.00019831
Gck	-1.29545	6.2561e-05	-0.900986	0.00323347	-0.707256	0.020024	-0.312796	0.33643
Gpd1	0.182107	0.0708164	-0.0109943	0.907897	0.016066	0.86577	-0.177036	0.0789871
Pfkm	-0.239487	0.014649	-0.327009	0.000407407	-0.0387022	0.675649	-0.126224	0.198265
Pfkfb3	1.58437	1.12792e-07	0.972004	0.000556056	0.292296	0.29943	-0.320069	0.283679
Pdk4	-1.5174	0.000199281	-0.973343	0.0113746	-0.289909	0.450923	0.25415	0.533265
Fbp2	-0.53402	0.000119971	-0.570922	9.45657e-06	0.711635	3.82395e-08	0.674733	1.07926e-06
Ugp2	-0.372259	6.93825e-05	-0.349433	7.43185e-05	-0.0452164	0.608125	-0.0223903	0.810904
Gyg	-0.381878	0.000312529	-0.287884	0.00393213	-0.0273306	0.784269	0.0666634	0.529188
G6pdx	0.786181	0.00245919	1.06917	1.251e-05	-0.153065	0.534075	0.129927	0.614909
